# Supplementary material for: Flexible and electrically conductive composites based on 3D hierarchical silver dendrites
Source: Royal Society of Chemistry journal article supplement (doi:10.1039/d0sm00908c), 2020-01-01
Supplement: d0sm00908c1.pdf [file d0sm00908c1.pdf]

## Flexible and Electrically Conductive Composites based on 3D Hierarchical Silver Dendrites

Bo Song <sup>a</sup>, Xueqiao Wang <sup>a</sup>, Shiv Patel <sup>a</sup>, Fan Wu <sup>a</sup>, Kyoung-sik Moon <sup>a\*</sup> and Ching-Ping Wong <sup>a\*</sup>

<sup>a</sup>School of Materials Science and Engineering, Georgia Institute of Technology, 771 Ferst Drive, Atlanta, GA 30332, United States,

\*E-mail: [cp.wong@mse.gatech.edu](mailto:cp.wong@mse.gatech.edu); [ks.moon@mse.gatech.edu](mailto:ks.moon@mse.gatech.edu)

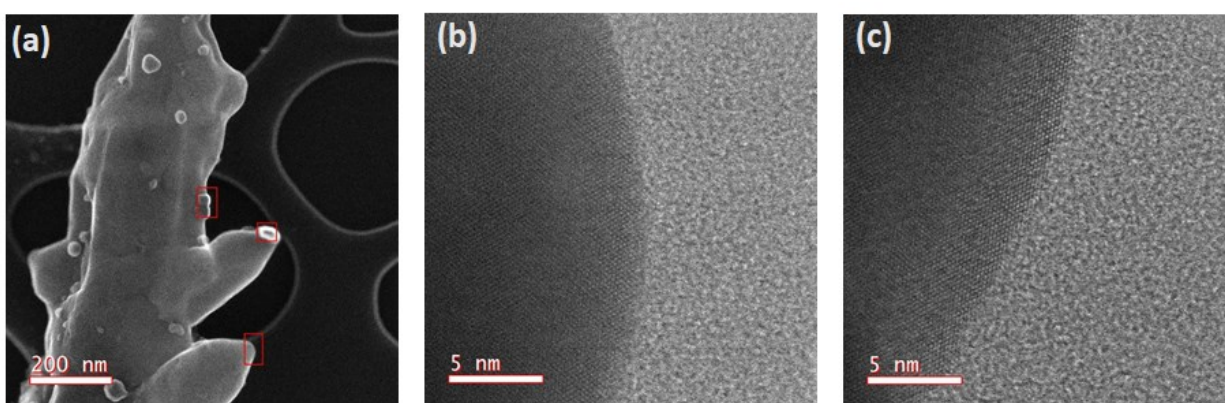

Fig. S1 (a) STEM image of a SD branch with red box indicating HR imaging locations; (b-c) HR STEM imaging at the rims of SD branches.

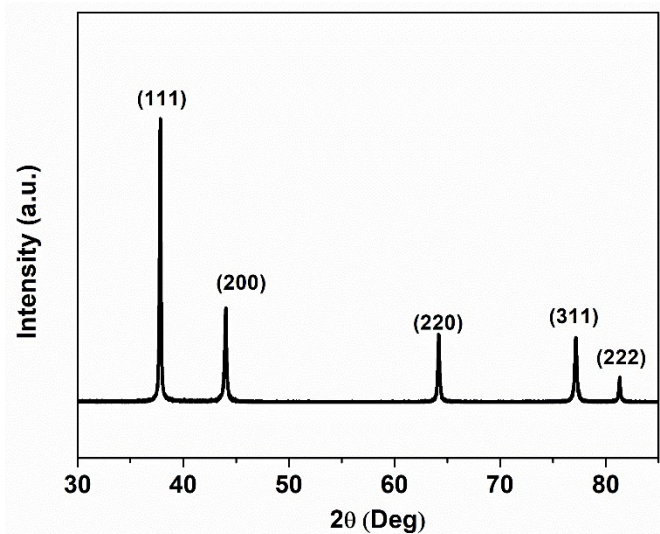

Fig. S2 XRD patterns of SD structures.

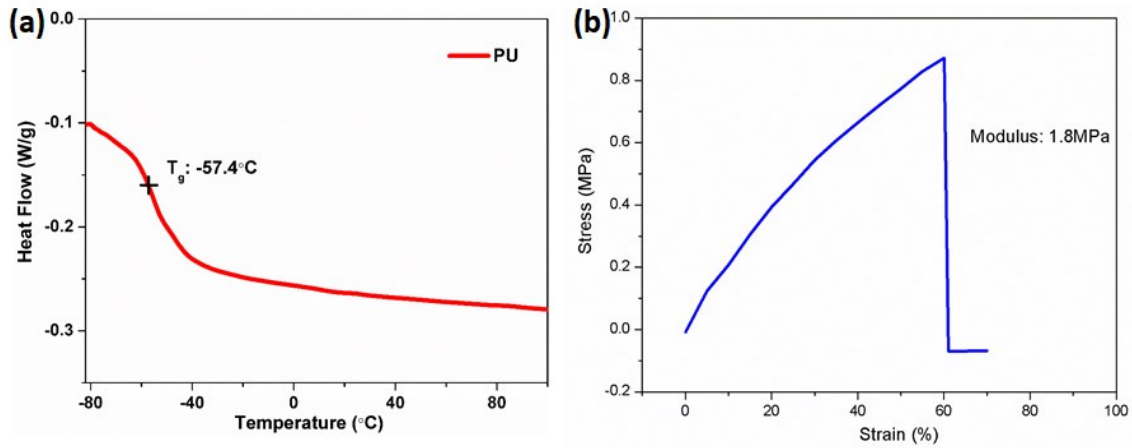

Fig. S3 (a) DSC curve and (b) stress-strain curves of the cured PU resin.

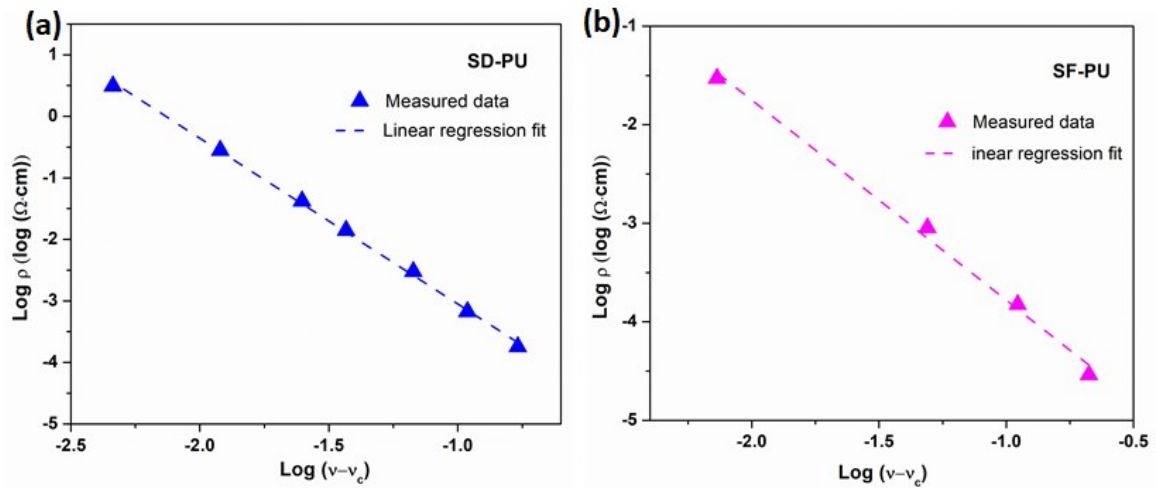

Fig. S4 Measured resistivity vs linear regression fitted resistivity data for (a) SD-PU and (b) SF-PU composites.

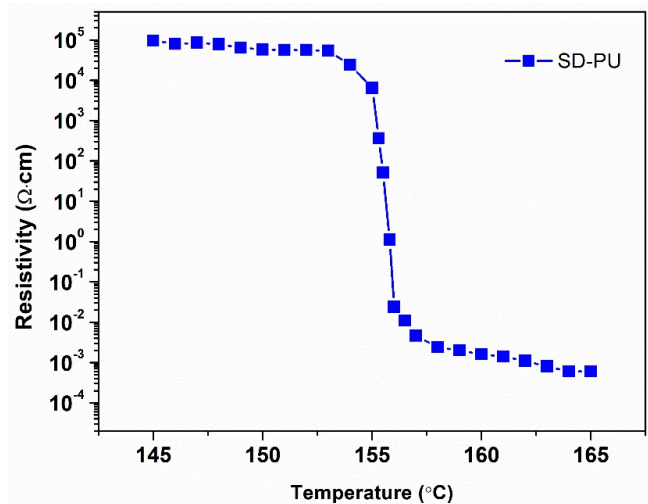

Fig. S5 Resistivity change of SD-PU film as a function of temperature in the course of curing reaction.
